# Supplementary material for: Specific Circular RNA Signature of Endothelial Cells: Potential Implications in Vascular Pathophysiology
Source: MDPI journal article supplement (doi:10.3390/ijms25010680), 2024-01-04

## Supplementary Figure S1. RNA sequencing and circRNA identification pipeline

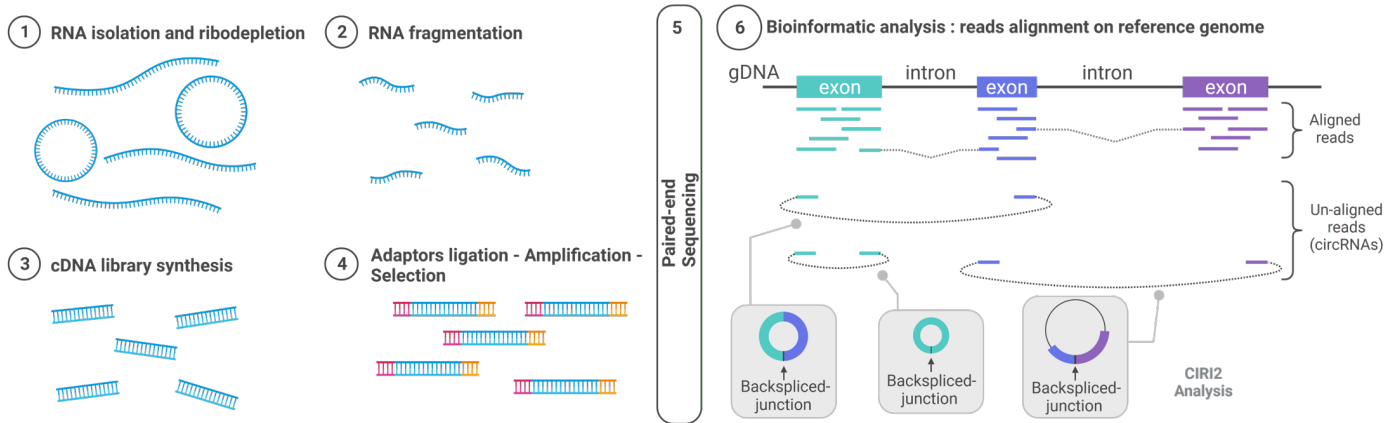

## Supplementary Figure S2. CircRNAs genomic localization and transcripts number in all cell lines

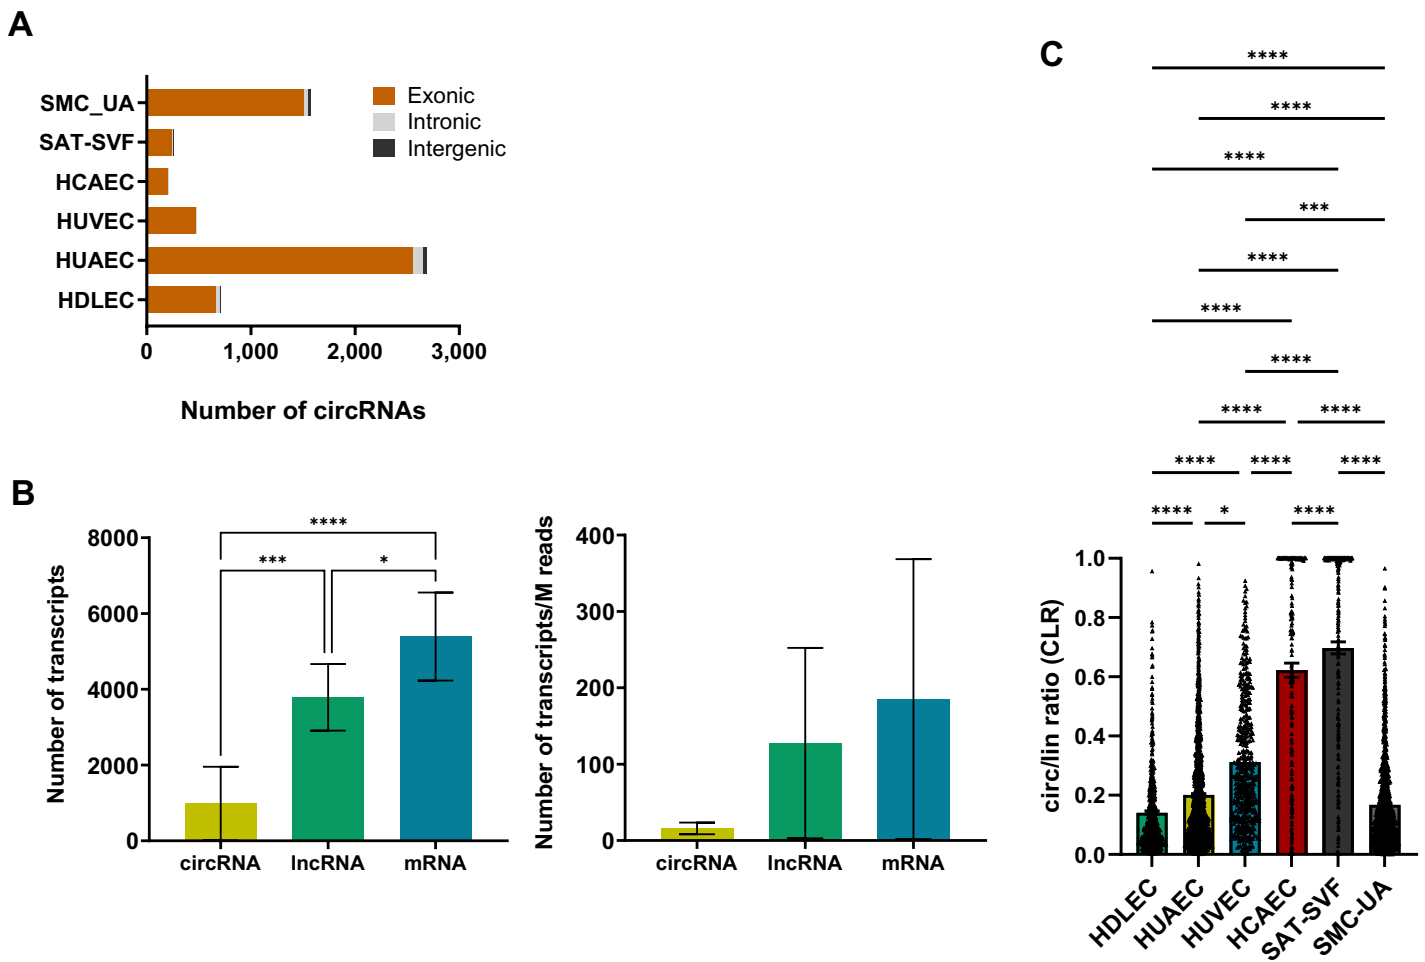

### Supplementary Figure S2. CircRNAs genomic localization and transcripts number in all cell lines

(A) Number of distinct circRNAs sorted by genomic origin for each cell type.

(B) Number of distinct transcripts read counts before (left) and after normalization by million (M) of total reads (right) for all cell types combined. Ordinary one-way Anova comparisons p values are plotted on the graphs: \* $<0,05$ ; \*\*\* $<0,001$ ; \*\*\*\* $<0,0001$ .

(C) Circular on linear transcript read counts for circRNA expressing genes two-way Anova comparisons: \* $<0,05$ ; \*\*\*\* $<0,0001$ .

Supplementary Figure S3. Expression of circRNAs as a function of that of their linear counterparts

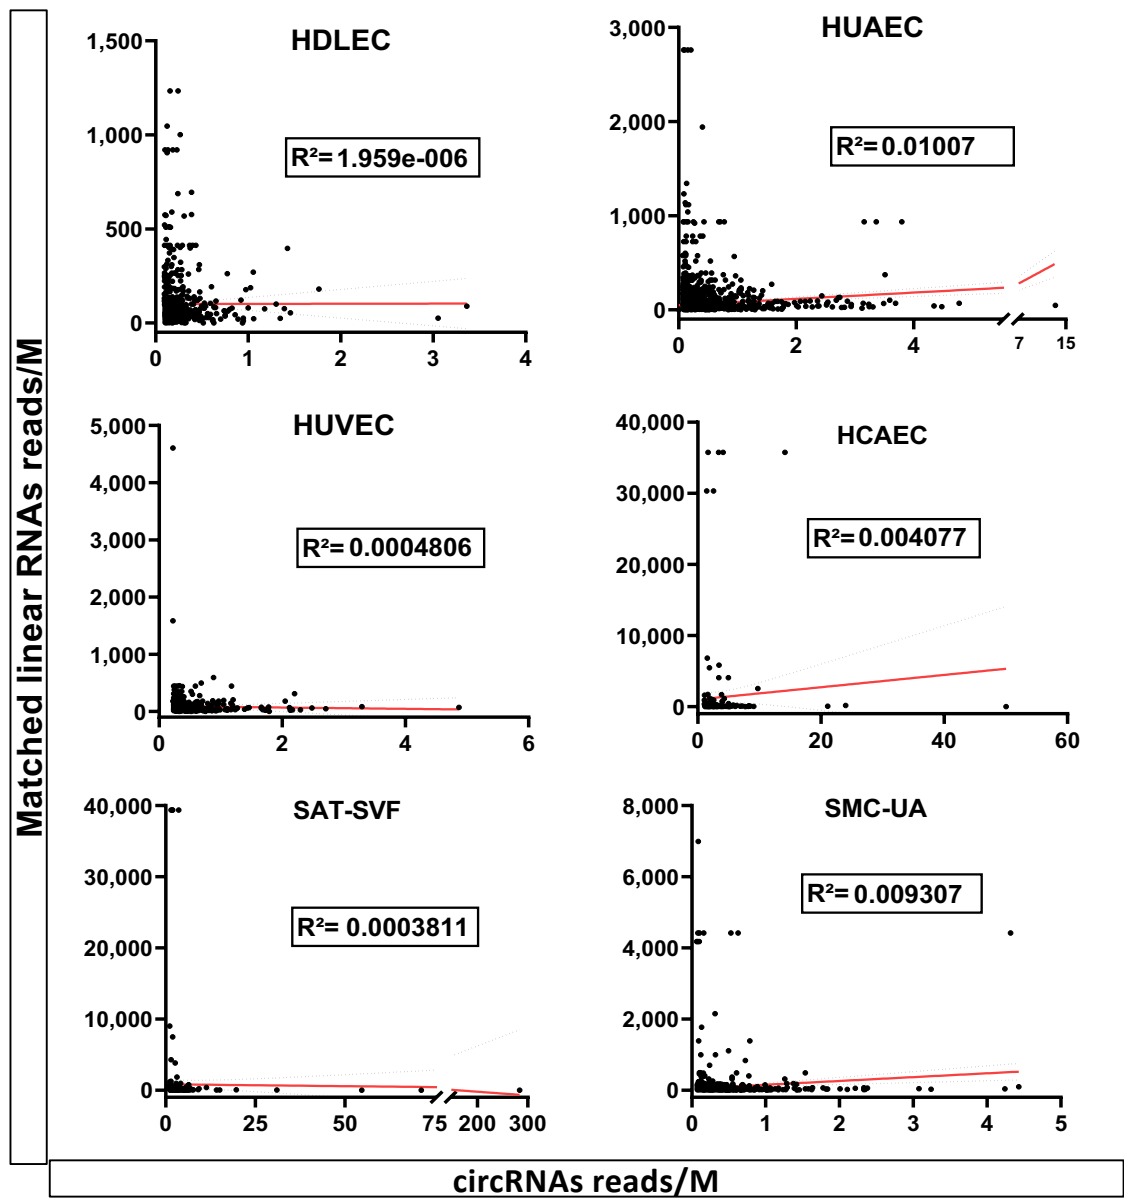

## Supplementary Figure S4. Pearson correlation r p values for all transcripts in all cell types

| circRNAs Pearson r p values |          |         |         |         |         |          |
|-----------------------------|----------|---------|---------|---------|---------|----------|
|                             | HDLEC    | HUAEC   | HUVEC   | HCAEC   | SAT-SVF | SMC-UA   |
| HDLEC                       |          | 0,0E+00 | 0,0E+00 | 1,8E-03 | 4,3E-01 | 1,1E-219 |
| HUAEC                       | 0,0E+00  |         | 0,0E+00 | 1,6E-03 | 7,4E-01 | 0,0E+00  |
| HUVEC                       | 0,0E+00  | 0,0E+00 |         | 2,8E-04 | 2,7E-01 | 0,0E+00  |
| HCAEC                       | 1,8E-03  | 1,6E-03 | 2,8E-04 |         | 7,9E-64 | 6,9E-01  |
| SAT-SVF                     | 4,3E-01  | 7,4E-01 | 2,7E-01 | 7,9E-64 |         | 1,1E-01  |
| SMC-UA                      | 1,1E-219 | 0,0E+00 | 0,0E+00 | 6,9E-01 | 1,1E-01 |          |

| Matched linear RNAs Pearson r p values |         |         |          |         |          |         |
|----------------------------------------|---------|---------|----------|---------|----------|---------|
|                                        | HDLEC   | HUAEC   | HUVEC    | HCAEC   | SAT-SVF  | SMC-UA  |
| HDLEC                                  |         | 4,7E-23 | 4,5E-44  | 6,6E-01 | 5,4E-01  | 7,5E-01 |
| HUAEC                                  | 4,7E-23 |         | 2,4E-09  | 4,5E-01 | 3,6E-01  | 2,9E-01 |
| HUVEC                                  | 4,5E-44 | 2,4E-09 |          | 1,2E-75 | 6,6E-148 | 6,3E-01 |
| HCAEC                                  | 6,6E-01 | 4,5E-01 | 1,2E-75  |         | 2,0E-28  | 7,2E-01 |
| SAT-SVF                                | 5,4E-01 | 3,6E-01 | 6,6E-148 | 2,0E-28 |          | 7,6E-01 |
| SMC-UA                                 | 7,5E-01 | 2,9E-01 | 6,3E-01  | 7,2E-01 | 7,6E-01  |         |

| lncRNAs Pearson r p values |         |         |          |          |          |         |
|----------------------------|---------|---------|----------|----------|----------|---------|
|                            | HDLEC   | HUAEC   | HUVEC    | HCAEC    | SAT-SVF  | SMC-UA  |
| HDLEC                      |         | 0,0E+00 | 0,0E+00  | 6,2E-08  | 2,9E-17  | 0,0E+00 |
| HUAEC                      | 0,0E+00 |         | 0,0E+00  | 1,2E-01  | 2,8E-01  | 0,0E+00 |
| HUVEC                      | 0,0E+00 | 0,0E+00 |          | 2,7E-165 | 1,1E-128 | 0,0E+00 |
| HCAEC                      | 6,2E-08 | 1,2E-01 | 2,7E-165 |          | 6,7E-81  | 1,0E-12 |
| SAT-SVF                    | 2,9E-17 | 2,8E-01 | 1,1E-128 | 6,7E-81  |          | 5,3E-06 |
| SMC-UA                     | 0,0E+00 | 0,0E+00 | 0,0E+00  | 1,0E-12  | 5,3E-06  |         |

| mRNAs Pearson r p values |          |          |          |          |          |          |
|--------------------------|----------|----------|----------|----------|----------|----------|
|                          | HDLEC    | HUAEC    | HUVEC    | HCAEC    | SAT-SVF  | SMC-UA   |
| HDLEC                    |          | 0,0E+00  | 0,0E+00  | 0,0E+00  | 0,0E+00  | 2,1E-179 |
| HUAEC                    | 0,0E+00  |          | 0,0E+00  | 0,0E+00  | 1,9E-292 | 0,0E+00  |
| HUVEC                    | 0,0E+00  | 0,0E+00  |          | 0,0E+00  | 0,0E+00  | 6,3E-262 |
| HCAEC                    | 0,0E+00  | 0,0E+00  | 0,0E+00  |          | 0,0E+00  | 7,7E-187 |
| SAT-SVF                  | 0,0E+00  | 1,9E-292 | 0,0E+00  | 0,0E+00  |          | 3,0E-228 |
| SMC-UA                   | 2,1E-179 | 0,0E+00  | 6,3E-262 | 7,7E-187 | 3,0E-228 |          |

## Supplementary Figure S5. Comparison of circRNAs expression across al cell types

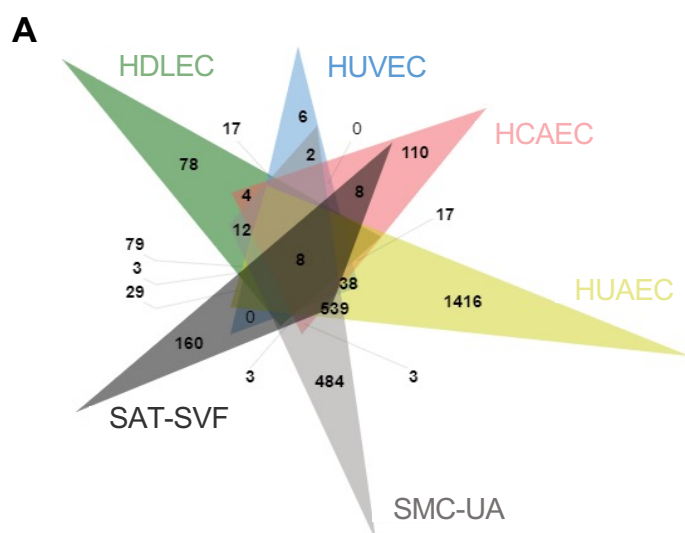

## B

| Term                                                                                    | Overlap | P-value | Adjusted P-value | Genes  |
|-----------------------------------------------------------------------------------------|---------|---------|------------------|--------|
| semaphorin-plexin signaling pathway involved in axon guidance (GO:1902287)              | 1/9     | 0,0018  | 0,0252           | PLXNA2 |
| motor neuron axon guidance (GO:0008045)                                                 | 1/10    | 0,0020  | 0,0252           | PLXNA2 |
| regulation of axon guidance (GO:1902667)                                                | 1/13    | 0,0026  | 0,0252           | PLXNA2 |
| semaphorin-plexin signaling pathway involved in neuron projection guidance (GO:1902285) | 1/13    | 0,0026  | 0,0252           | PLXNA2 |
| cell migration involved in sprouting angiogenesis (GO:0002042)                          | 1/14    | 0,0028  | 0,0252           | EPHB4  |
| blood vessel endothelial cell migration (GO:0043534)                                    | 1/18    | 0,0036  | 0,0270           | EPHB4  |
| regulation of axon extension involved in axon guidance (GO:0048841)                     | 1/23    | 0,0046  | 0,0295           | PLXNA2 |
| semaphorin-plexin signaling pathway (GO:0071526)                                        | 1/29    | 0,0058  | 0,0326           | PLXNA2 |
| regulation of axon extension (GO:0030516)                                               | 1/34    | 0,0068  | 0,0332           | PLXNA2 |
| positive regulation of axonogenesis (GO:0050772)                                        | 1/37    | 0,0074  | 0,0332           | PLXNA2 |

## Supplementary Figure S5. Comparison of circRNAs expression across al cell types

(A) Venn diagram representing the comparison of the lists of circRNAs expressed in all ECs.

(B) Enrichr gene ontology analysis terms and p values for the 4 EC-specific circRNAs.

# Supplementary Figure S6. Selected specific circRNAs and additional characteristics with sources

| circBase_ID       | Gene Name | circRNA Name  | circRNA localization     | Strand | Origin   | Genomic length (kb) | Spliced length (nt) | RBP (s) (Binding sites)                                                                              | miRNA (s) (Binding sites)                                                                                                                                                                                                                                                                                                                                                                                                                                                                                                                                                              | Gene description [sources]                                                                                                     | Gene-associated pathologies                               | Known circRNA functions                                                                 | References (PMID, doi)                           |
|-------------------|-----------|---------------|--------------------------|--------|----------|---------------------|---------------------|------------------------------------------------------------------------------------------------------|----------------------------------------------------------------------------------------------------------------------------------------------------------------------------------------------------------------------------------------------------------------------------------------------------------------------------------------------------------------------------------------------------------------------------------------------------------------------------------------------------------------------------------------------------------------------------------------|--------------------------------------------------------------------------------------------------------------------------------|-----------------------------------------------------------|-----------------------------------------------------------------------------------------|--------------------------------------------------|
| hsa_circ_0111952  | PROX1     | circPROX1     | chr1:213996469-214011715 | +      | exonic   | 15247               | 2095                | FMRP (3) IGF2BP2 (4) IGF2BP3 (4)                                                                     |                                                                                                                                                                                                                                                                                                                                                                                                                                                                                                                                                                                        | prospero homeobox 1, protein coding, transcription factor activity-cell specification [GeneCard; HGNC: 9459; NCBI: 5629]       | lymphatic malfunctions; cancers; obesity                  | none                                                                                    | 19056879; 16170315; 28024299; 22023334           |
| #N/A              | IQSEC1    | circIQSEC1    | chr3:13129305-13129525   | -      | intronic | 221                 | 221                 |                                                                                                      |                                                                                                                                                                                                                                                                                                                                                                                                                                                                                                                                                                                        | IQ Motif And Sec7 Domain ArfGEF 1, protein coding, GEF activity-endosomal protein traffic [GeneCards; HGNC: 29112; NCBI: 9922] | intellectual development disorder                         | none                                                                                    | 31607425                                         |
| hsa_circ_0008285  | CDYL      | circCDYL      | chr6:4891713-4892379     | +      | exonic   | 667                 | 667                 | AGO2 (3) EIF4A3 (4) FMRP (3) HuR (4) IGF2BP3 (4)                                                     | hsa-miR-1180 (2)                                                                                                                                                                                                                                                                                                                                                                                                                                                                                                                                                                       | Chromodomain Y Like, protein coding, histone modification-transcriptional repression [GeneCards; HGNC: 1811; NCBI: 9425]       | cancer chemoresistance                                    | pro-myocardial regeneration in vitro                                                    | 19061646; 13167252; 32522972                     |
| hsa_circ_0001727  | ZKSCAN1   | circZKSCAN1   | chr7:100023419-100024307 | +      | exonic   | 889                 | 668                 | EIF4A3 (4) FMRP (5) HuR (7) IGF2BP3 (4)                                                              |                                                                                                                                                                                                                                                                                                                                                                                                                                                                                                                                                                                        | Zinc Finger With KRAB And SCAN Domains 1, protein coding, transcription factor activity- [GeneCards; HGNC: 13101; NCBI: 7586]  | gastric cancer; Hepatocellular cancer                     | anti-hepatocellular cancers progression                                                 | 7557990; 28211215; 33439397                      |
| hsa_circ_0005895  | CARD6     | circCARD6     | chr5:40852174-40854096   | +      | exonic   | 1923                | 1923                | AGO2 (5) EIF4A3 (6)                                                                                  | hsa-miR-599 (3)                                                                                                                                                                                                                                                                                                                                                                                                                                                                                                                                                                        | Caspase Recruitment Domain Family Member 6, protein coding [GeneCards; HGNC: 16394; NCBI: 84674]                               | inflammatory bowel diseases                               | pro-posterior capsul opacification (eye)                                                | 12775719; 16418290; 20025480; 33844960;          |
| hsa_circ_0002472  | PLXNA2    | circPLXNA2    | chr1:208210280-208218002 | -      | exonic   | 7723                | 1451                | AGO2 (3) EIF4A3 (10) FUS (3) HuR (3)                                                                 | hsa-miR-1205 (3) hsa-miR-1286 (3)                                                                                                                                                                                                                                                                                                                                                                                                                                                                                                                                                      | Plexin A2, protein coding [GeneCards; HGNC: 9100; NCBI: 5362]                                                                  | axonal guidance dysfunctions; Breast cancer tumorigenesis | pro-proliferation and anti-apoptosis in myoblasts                                       | 16402134; 21925246; 10.3390/jms24065459          |
| hsa_circ_0000914  | FKBP8     | circFKBP8     | chr19:18537601-18538436  | -      | exonic   | 836                 | 394                 | EIF4A3 (3) FMRP (3)                                                                                  |                                                                                                                                                                                                                                                                                                                                                                                                                                                                                                                                                                                        | FKBP Prolyl Isomerase 8, protein coding [GeneCards; HGNC: 3724; NCBI: 23770]                                                   | spina bifida                                              | none                                                                                    | 18003640; 32969478                               |
| #N/A              | ERCC6L    | circERCC6L2   | chr9:95978061-96004701   | +      | exonic   | 26641               | 337                 |                                                                                                      |                                                                                                                                                                                                                                                                                                                                                                                                                                                                                                                                                                                        | ERCC Excision Repair 6 Like 2, protein coding [GeneCards; HGNC: 26922; NCBI: 375748]                                           | bone marrow failure syndrome                              | none                                                                                    | 4507776                                          |
| #N/A              | FIRRE     | circFIRRE     | chrX:131749306-131794466 | -      | exonic   | 45161               | 872                 |                                                                                                      |                                                                                                                                                                                                                                                                                                                                                                                                                                                                                                                                                                                        | Firre Intergenic Repeating RNA Element, lncRNA [GeneCards; HGNC: 49627; NCBI: 286467]                                          | various cancers                                           | chrX inactivation and nuclear organisation? RNA stability?                              | 35110535; 35988459; 29678151; 30124921;          |
| hsa_circ_0007026  | ZMYND8    | circZMYND8_A  | chr20:47262288-47276795  | -      | exonic   | 14508               | 623                 | AGO2 (4) EIF4A3 (3)                                                                                  | hsa-miR-370 (2) hsa-miR-625 (2)                                                                                                                                                                                                                                                                                                                                                                                                                                                                                                                                                        | Zinc Finger MYND-Type Containing 8, protein coding [GeneCards; HGNC: 9397; NCBI: 23613]                                        | various cancers                                           | none                                                                                    | 11003709; 27477906                               |
| hsa_circ_0003028  | FUT8      | circFUT8      | chr14:65561337-65561766  | +      | exonic   | 430                 | 430                 | AGO2 (2) HuR (4)                                                                                     | hsa-miR-1305 (2)                                                                                                                                                                                                                                                                                                                                                                                                                                                                                                                                                                       | Fucosyltransferase 8, protein coding [GeneCards; HGNC: 4019 NCBI: 2530]                                                        | various cancers; congenital disorders                     | cancer suppression or promotion?                                                        | 19302290; 26289314; 29304374; 32072011; 33500381 |
| #N/A              | SERPINE1  | circSERPIN E1 | chr7:101131916-101135801 | +      | exonic   | 3886                | 541                 |                                                                                                      |                                                                                                                                                                                                                                                                                                                                                                                                                                                                                                                                                                                        | Serpin Family E Member 1, protein coding [GeneCards; HGNC: 8583 NCBI: 5054]                                                    | Thrombosis; PAI1-deficiency                               | none                                                                                    | 3922531; 9207454                                 |
| hsa_circ_00087960 | LPAR1     | circLPAR1     | chr9:110972073-110973558 | -      | exonic   | 1486                | 226                 | None                                                                                                 |                                                                                                                                                                                                                                                                                                                                                                                                                                                                                                                                                                                        | Lysophosphatidic Acid Receptor 1, protein coding [GeneCards; HGNC: 3166 NCBI: 1902]                                            | pertusis                                                  | invasive bladder cancer biomarker                                                       | 30867795; 9804623                                |
| #N/A              | ABHD14B   | circABHD14B   | chr3:51968816-51969034   | +      | exonic   | 219                 | 219                 |                                                                                                      |                                                                                                                                                                                                                                                                                                                                                                                                                                                                                                                                                                                        | Abhydrolase Domain Containing 14B, protein coding [GeneCards; HGNC: 28235 NCBI: 84836]                                         | none                                                      | none                                                                                    |                                                  |
| hsa_circ_0128684  | HNRNP AB  | circHNRNP AB  | chr5:178210635-178210877 | +      | exonic   | 243                 | 243                 | AGO2 (4) FMRP (4) HuR (3) LIN28A (3)                                                                 | hsa-miR-625 (2)                                                                                                                                                                                                                                                                                                                                                                                                                                                                                                                                                                        | Heterogeneous Nuclear Ribonucleoprotein A/B, protein coding [GeneCards; HGNC: 5034 NCBI: 3182]                                 | none                                                      | none                                                                                    |                                                  |
| hsa_circ_0005015  | HAS2      | circHAS2      | chr8:121628714-121629340 | -      | exonic   | 627                 | 627                 | EIF4A3 (6)                                                                                           | hsa-miR-519d-3p                                                                                                                                                                                                                                                                                                                                                                                                                                                                                                                                                                        | Hyaluronan Synthase 2, protein coding [GeneCrads; HGNC: 4819 NCBI: 3037]                                                       | breast cancer                                             | diabetes retinopathy biomarker                                                          | 29288268; 22113945; 33954907                     |
| hsa_circ_0001461  | FAT1      | circFAT1      | chr4:186706563-186709845 | -      | exonic   | 3283                | 3283                | AGO2 (19) EIF4A3 (26) FMRP (25) HuR (17) IGF2BP1 (13) IGF2BP2 (17) IGF2BP3 (18) LIN28A (15) PTB (15) | hsa-miR-1183 (3) hsa-miR-1208 (5) hsa-miR-1229 (2) hsa-miR-1231 (2) hsa-miR-1236 (3) hsa-miR-1238 (2) hsa-miR-1245 (2) hsa-miR-1248 (2) hsa-miR-1287 (3) hsa-miR-1305 (2) hsa-miR-142-3p (2) hsa-miR-145 (2) hsa-miR-186 (2) hsa-miR-198 (2) hsa-miR-326 (2) hsa-miR-330-5p (2) hsa-miR-338-3p (2) hsa-miR-377 (2) hsa-miR-507 (2) hsa-miR-515-5p (2) hsa-miR-520f (2) hsa-miR-548g (5) hsa-miR-548p (2) hsa-miR-557 (2) hsa-miR-570 (2) hsa-miR-579 (2) hsa-miR-580 (2) hsa-miR-587 (3) hsa-miR-616 (2) hsa-miR-626 (2) hsa-miR-662 (2) hsa-miR-668 (2) hsa-miR-7 (2) hsa-miR-4781-3p | FAT Atypical Cadherin 1, protein coding [GeneCards; HGNC: 3595 NCBI: 2195]                                                     | various cancers                                           | pro-cancer cell stemness; pro-breast cancer drug resistance; osteoblast differentiation | 34314629; 34288822; 35003269; 23354438;          |

## Supplementary Figure S7. Schematic representation of selected circRNAs and their structures

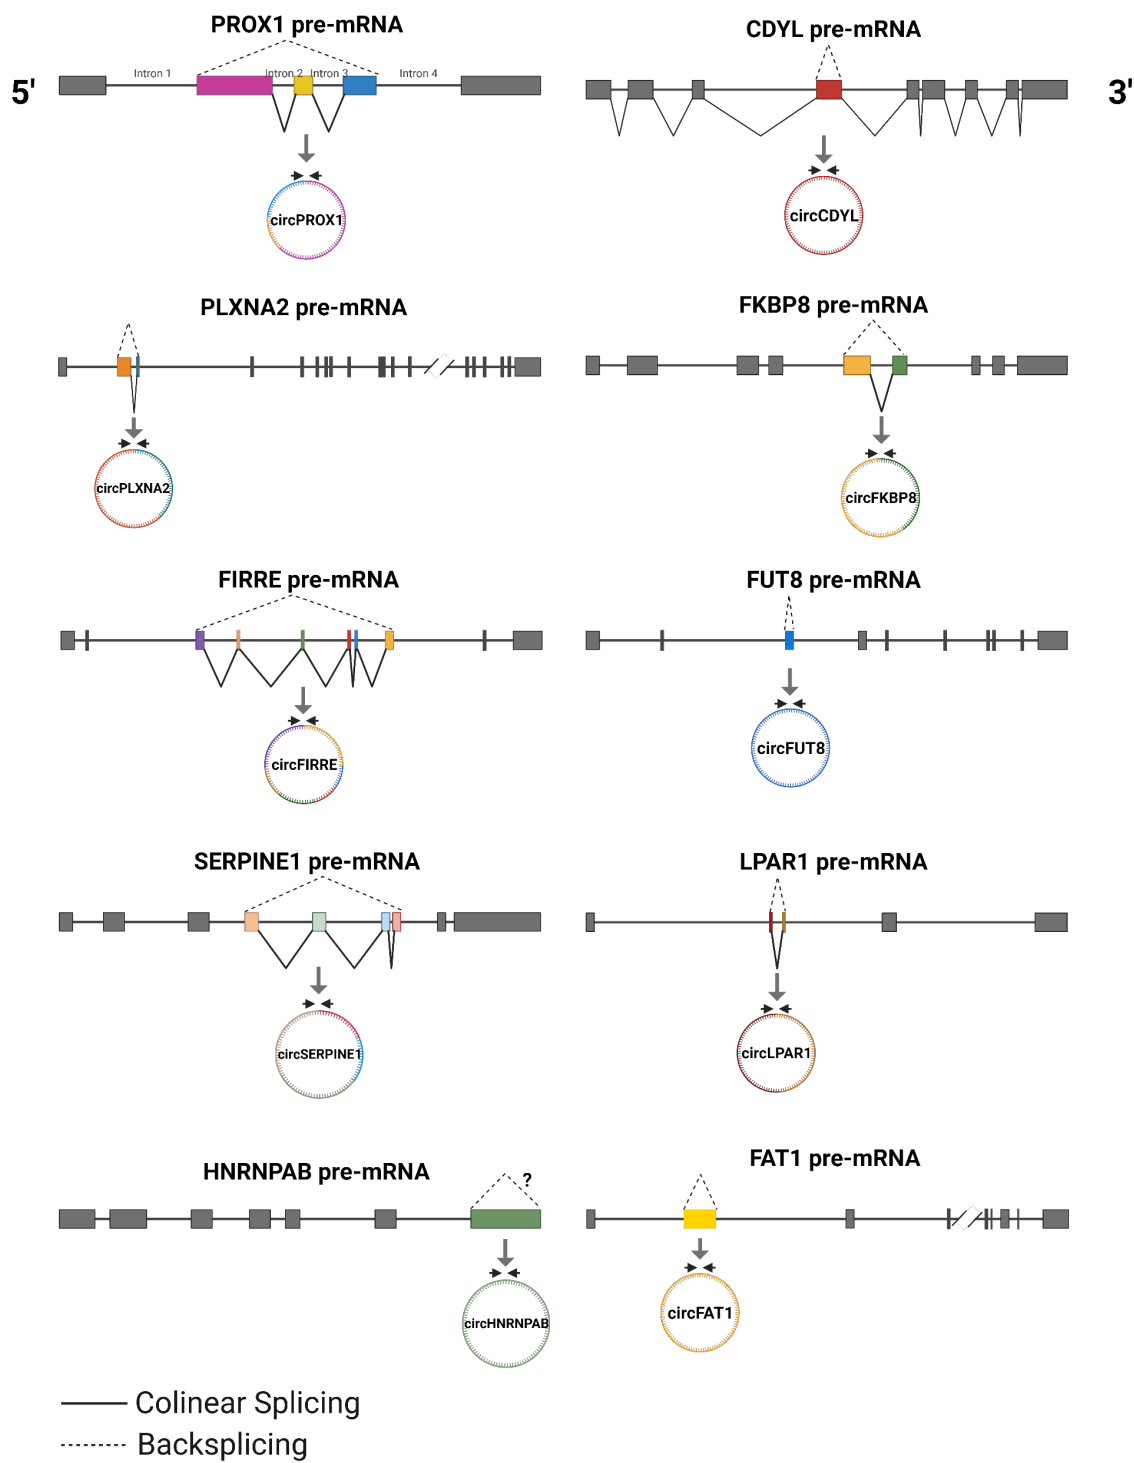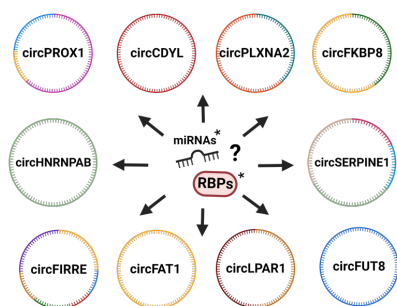

## Supplementary Figure S8. RNAseq expression levels for selected transcripts in all cell types

**A**

| circRNAs (reads/Million) |       |       |       |       |         |        | matched linRNAs (reads/Million) |        |         |         |          |         |          |
|--------------------------|-------|-------|-------|-------|---------|--------|---------------------------------|--------|---------|---------|----------|---------|----------|
| Name                     | HDLEC | HUAEC | HUVEC | HCAEC | SAT-SVF | SMC-UA | Name                            | HDLEC  | HUAEC   | HUVEC   | HCAEC    | SAT-SVF | SMC-UA   |
| circPROX1                | 1,42  | 0,00  | 0,00  | 0,00  | 0,00    | 0,00   | PROX1                           | 396,63 | 0,35    | 3,52    | 8,86     | 0,00    | 1,36     |
| circIQSEC1               | 0,94  | 0,00  | 0,00  | 0,00  | 0,00    | 0,00   | IQSEC                           | 59,019 | 8,619   | 8,212   | 17,228   | 2,574   | 148,131  |
| circCDYL                 | 0,89  | 3,12  | 2,29  | 6,06  | 0,38    | 21,92  | CDYL                            | 20,60  | 16,09   | 29,39   | 26,06    | 1,21    | 87,37    |
| circZKSCAN1              | 0,83  | 2,94  | 2,48  | 1,85  | 0,92    | 27,98  | ZKSCAN1                         | 79,25  | 57,57   | 61,22   | 50,11    | 2,42    | 490,56   |
| circCARD6                | 0,42  | 0,77  | 0,39  | 1,79  | 0,00    | 0,00   | CARD6                           | 60,80  | 21,85   | 39,02   | 18,32    | 0,83    | 17,63    |
| circPLXNA2               | 0,25  | 0,51  | 0,60  | 2,58  | 0,00    | 0,00   | PLXNA2                          | 177,00 | 170,50  | 168,54  | 920,79   | 1,52    | 54,44    |
| circFKBP8                | 0,00  | 1,52  | 0,32  | 0,00  | 0,00    | 4,09   | FKBP8                           | 67,71  | 58,22   | 122,53  | 97,01    | 10,72   | 551,57   |
| circERCC6L2              | 0,00  | 1,36  | 0,32  | 0,00  | 0,00    | 5,81   | ERCC6L2                         | 19,07  | 29,46   | 13,99   | 5,87     | 0,63    | 199,70   |
| circFIRRE                | 0,00  | 0,93  | 0,00  | 0,00  | 0,00    | 0,00   | FIRRE                           | 0,50   | 11,27   | 2,28    | 0,00     | 0,00    | 3,13     |
| circZMYND8_A             | 0,00  | 0,00  | 0,40  | 0,00  | 0,00    | 0,00   | ZMYND8                          | 74,89  | 22,55   | 77,01   | 38,29    | 2,26    | 164,29   |
| circFUT8                 | 0,00  | 0,00  | 0,28  | 0,00  | 0,00    | 0,00   | FUT8                            | 5,83   | 22,02   | 21,13   | 16,60    | 0,68    | 245,05   |
| circSERPINE1             | 0,00  | 0,00  | 0,00  | 14,16 | 0,00    | 0,00   | SERPINE1                        | 87,38  | 1400,27 | 2488,48 | 35759,38 | 50,91   | 19085,71 |
| circLPAR1                | 0,00  | 0,00  | 0,00  | 0,00  | 0,60    | 4,14   | LPAR1                           | 0,00   | 0,75    | 0,00    | 1,63     | 13,28   | 266,92   |
| circABHD14B              | 0,00  | 0,00  | 0,00  | 0,00  | 0,45    | 0,00   | ABHD14B                         | 10,49  | 2,26    | 15,59   | 177,96   | 16,17   | 28,94    |
| circHNRNPAB              | 0,00  | 0,00  | 0,00  | 0,00  | 0,43    | 0,00   | HNRNPAB                         | 98,14  | 35,91   | 112,44  | 38,18    | 2,27    | 110,61   |
| circHAS2                 | 0,00  | 0,00  | 0,00  | 0,00  | 0,00    | 34,09  | HAS2                            | 0,00   | 0,91    | 0,38    | 0,00     | 0,23    | 816,36   |
| circFAT1                 | 0,00  | 0,00  | 0,00  | 0,00  | 0,00    | 19,39  | FAT1                            | 0,81   | 23,92   | 18,31   | 4,89     | 16,59   | 4882,22  |

**B**

| circ/lin ratio (CLR) |       |       |       |       |         |        |
|----------------------|-------|-------|-------|-------|---------|--------|
| Name                 | HDLEC | HUAEC | HUVEC | HCAEC | SAT-SVF | SMC-UA |
| circPROX1            | 0,17  | #N/A  | #N/A  | #N/A  | #N/A    | #N/A   |
| circIQSEC1           | 0,77  | #N/A  | #N/A  | #N/A  | #N/A    | #N/A   |
| circCDYL             | 0,53  | 0,81  | 0,76  | 0,71  | 0,65    | 0,74   |
| circZKSCAN1          | 0,27  | 0,66  | 0,66  | 0,50  | 0,82    | 0,49   |
| circCARD6            | 0,15  | 0,49  | 0,30  | 0,64  | #N/A    | #N/A   |
| circPLXNA2           | 0,09  | 0,11  | 0,22  | 0,35  | #N/A    | #N/A   |
| circFKBP8            | #N/A  | 0,21  | 0,03  | #N/A  | #N/A    | 0,05   |
| circERCC6L2          | #N/A  | 0,69  | 0,55  | #N/A  | #N/A    | 0,38   |
| circFIRRE            | #N/A  | 0,72  | #N/A  | #N/A  | #N/A    | #N/A   |
| circZMYND8_A         | #N/A  | #N/A  | 0,19  | #N/A  | #N/A    | #N/A   |
| circFUT8             | #N/A  | #N/A  | 0,23  | #N/A  | #N/A    | #N/A   |
| circSERPINE1         | #N/A  | #N/A  | #N/A  | 0,00  | #N/A    | #N/A   |
| circLPAR1            | #N/A  | #N/A  | #N/A  | #N/A  | 0,47    | 0,15   |
| circABHD14B          | #N/A  | #N/A  | #N/A  | #N/A  | 0,10    | #N/A   |
| circHNRNPAB          | #N/A  | #N/A  | #N/A  | #N/A  | 0,41    | #N/A   |
| circHAS2             | #N/A  | #N/A  | #N/A  | #N/A  | #N/A    | 0,38   |
| circFAT1             | #N/A  | #N/A  | #N/A  | #N/A  | #N/A    | 0,22   |

**Supplementary Figure S9. qPCR relative expression levels for selected transcripts in all cell types**

| circRNAs (RT-qPCR) |       |         |         |         |            |          | matched linRNAs (RT-qPCR) |       |         |         |        |           |          | Coherence |
|--------------------|-------|---------|---------|---------|------------|----------|---------------------------|-------|---------|---------|--------|-----------|----------|-----------|
| Name               | HDLEC | HUAEC   | HUVEC   | HCAEC   | SAT-SVF    | SMC-UA   | Name                      | HDLEC | HUAEC   | HUVEC   | HCAEC  | SAT-SVF   | SMC-UA   |           |
| circPROX1          | 1,00  | 0,00    | 0,00    | 0,00    | 0,00       | 0,00     | PROX1                     | 1,00  | 0,00    | 0,00    | 0,00   | 0,02      | 0,00     | YES       |
| circIQSEC1         | 1,00  | 0,00    | 0,00    | 0,00    | 0,02       | 0,00     | IQSEC                     | 1,00  | 0,02    | 0,02    | 0,02   | 0,25      | 0,02     | NO        |
| circCDYL           | 1,00  | 2,21    | 0,71    | 1,44    | 2,91       | 1,03     | CDYL                      | 1,00  | 0,52    | 0,36    | 0,27   | 0,98      | 0,22     | NO        |
| circZKSCAN1        | 1,00  | 2,04    | 0,64    | 0,83    | 2,42       | 0,56     | ZKSCAN1                   | 1,00  | 0,26    | 0,28    | 0,18   | 0,69      | 0,10     | NO        |
| circCARD6          | 1,00  | 0,15    | 0,22    | 0,29    | 3,65       | 0,21     | CARD6                     | 1,00  | 0,60    | 0,39    | 0,21   | 1,64      | 0,12     | NO        |
| circPLXNA2         | 1,00  | 0,64    | 0,98    | 1,00    | 0,05       | 0,17     | PLXNA2                    | 1,00  | 0,38    | 0,34    | 0,54   | 0,14      | 0,02     | NO        |
| circFKBP8          | 1,00  | 1,41    | 0,43    | 0,98    | 5,45       | 0,65     | FKBP8                     | 1,00  | 0,30    | 0,40    | 0,32   | 1,47      | 0,43     | NO        |
| circERCC6L2        | 1,00  | 0,94    | 0,34    | 0,29    | 1,64       | 0,73     | ERCC6L2                   | 1,00  | 0,28    | 0,33    | 0,06   | 1,10      | 0,05     | NO        |
| circFIRRE          | 1,00  | 8,85    | 1,48    | 1,38    | 1,25       | 0,21     | FIRRE                     | 1,00  | 10,30   | 0,10    | 0,00   | 0,02      | 0,08     | YES       |
| circZMYND8_A       | 1,00  | 0,76    | 0,43    | 0,33    | 0,60       | 0,19     | ZMYND8                    | 1,00  | 0,12    | 0,21    | 0,05   | 0,26      | 0,04     | NO        |
| circFUT8           | 1,00  | 7,81    | 5,96    | 13,34   | 6,63       | 10,82    | FUT8                      | 1,00  | 1,97    | 3,26    | 3,87   | 6,15      | 2,14     | NO        |
| circSERPINE1       | 1,00  | 1,50    | 0,71    | 1355,31 | 13,52      | 0,47     | SERPINE1                  | 1,00  | 1,74    | 1,23    | 1,05   | 0,19      | 1,50     | NO        |
| circLPAR1          | 1,00  | 4401,30 | 3622,10 | 3,38    | 1555217,12 | 74697,84 | LPAR1                     | 1,00  | 2075,32 | 5392,33 | 164,12 | 896301,20 | 84534,65 | NO        |
| circABHD14B        |       |         |         |         |            |          | ABHD14B                   | 1,00  | 0,13    | 0,16    | 0,20   | 1,53      | 0,15     | NO        |
| circHNRNPAB        | 1,00  | 0,91    | 1,03    | 0,82    | 5,09       | 1,00     | HNRNPAB                   | 1,00  | 1,01    | 0,86    | 1,13   | 1,96      | 0,40     | NO        |
| circHAS2           | 1,00  | 556,76  | 189,88  | 66,90   | 8207,32    | 15330,11 | HAS2                      | 1,00  | 105,36  | 41,03   | 2,01   | 6952,36   | 995,22   | NO        |
| circFAT1           | 1,00  | 1,31    | 3,18    | 0,01    | 0,04       | 143,98   | FAT1                      | 1,00  | 3,29    | 1,51    | 0,04   | 50,04     | 29,04    | NO        |

**circRNAs**

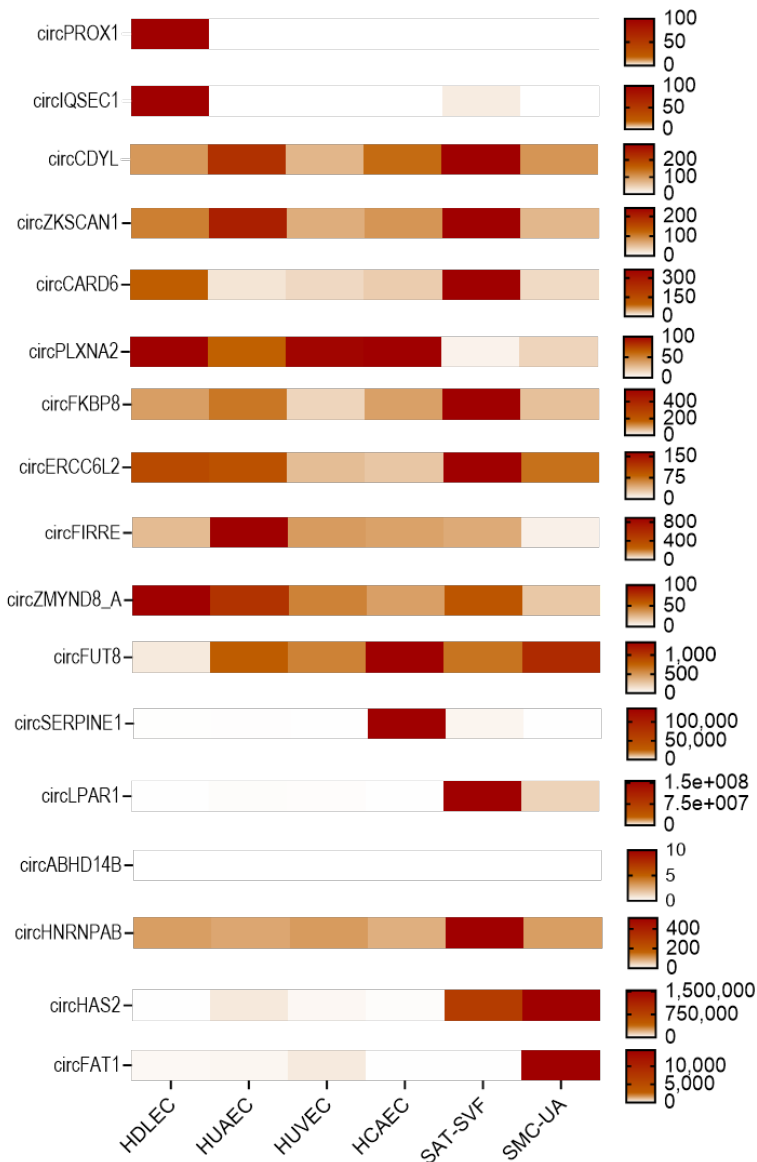

**Linear RNAs**

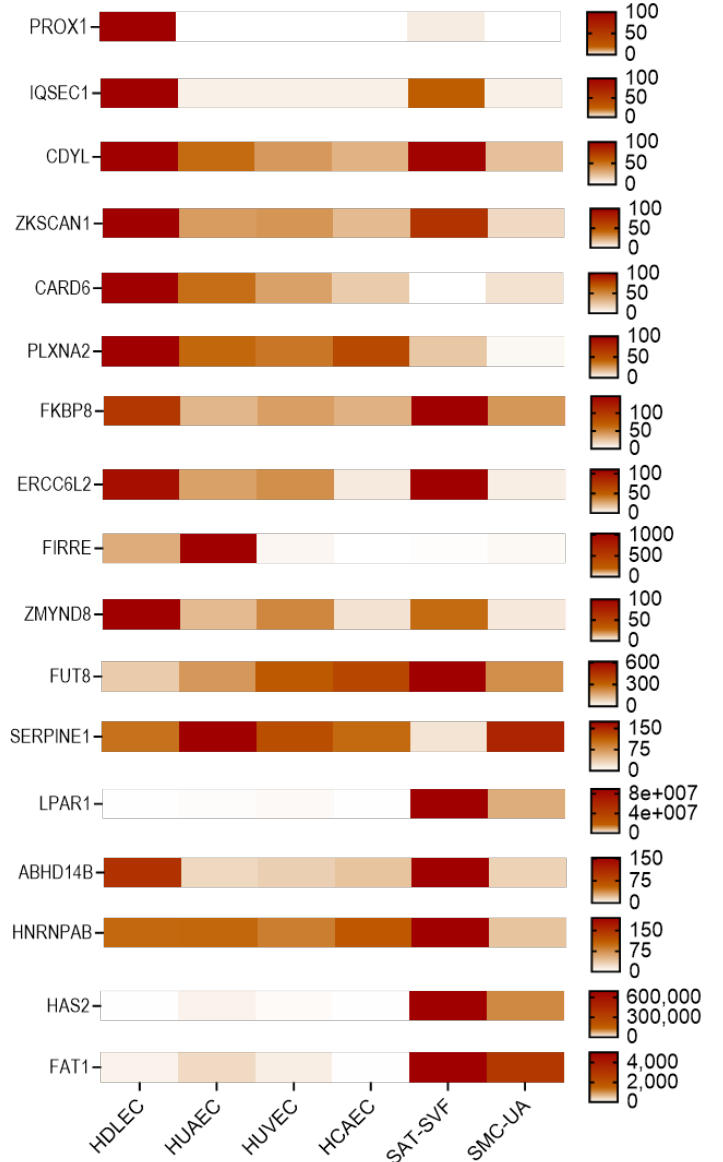

Supplement: s1 [file s1]
